# Supplementary material
Source: PubMed Central journal article supplement (PMC6175645)

**A**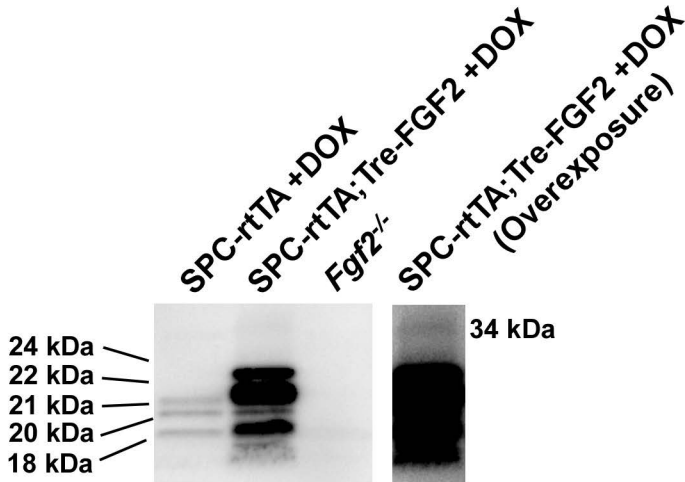**B**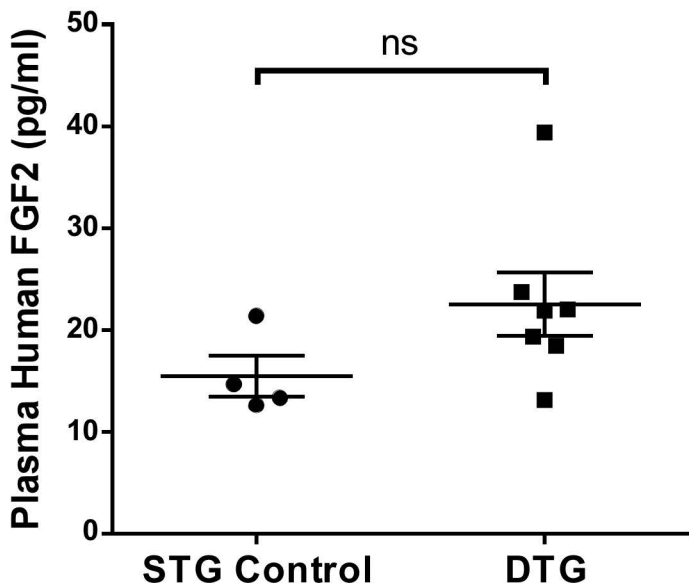

STG - DOX d=0-21

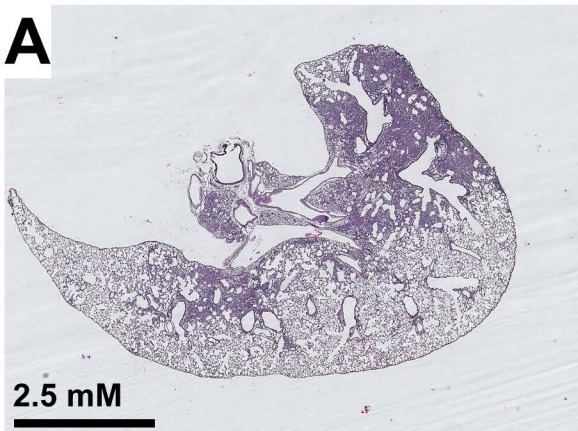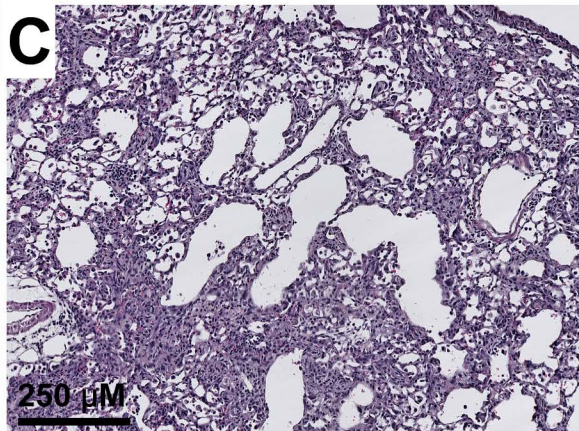

DTG - DOX d=0-21

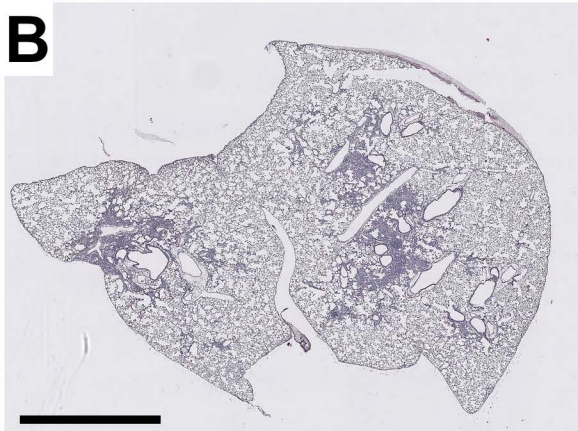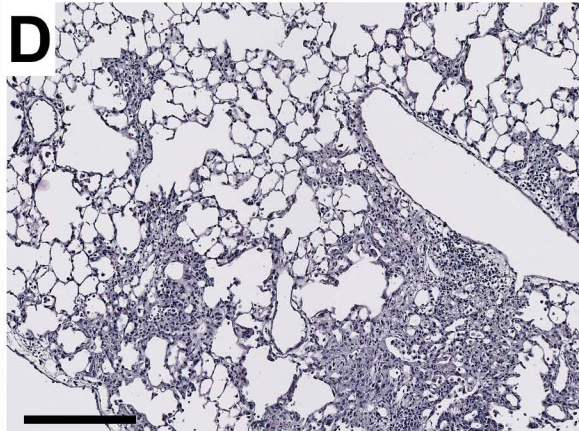

**E**

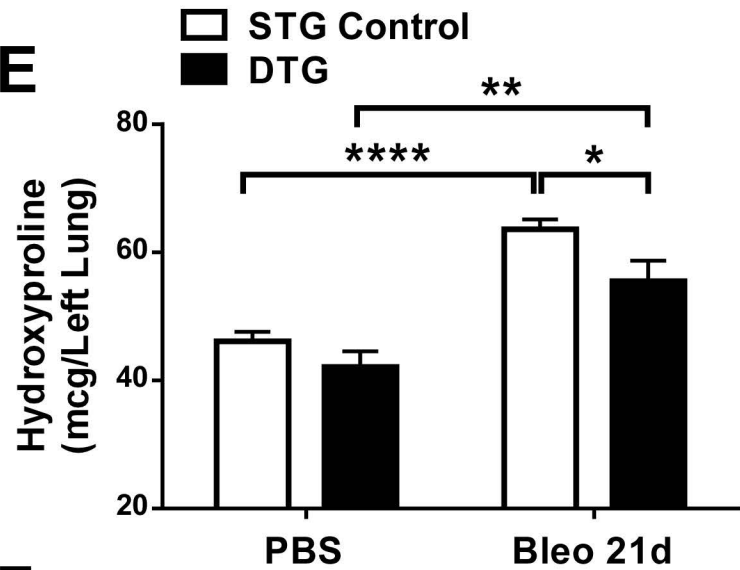

**F**

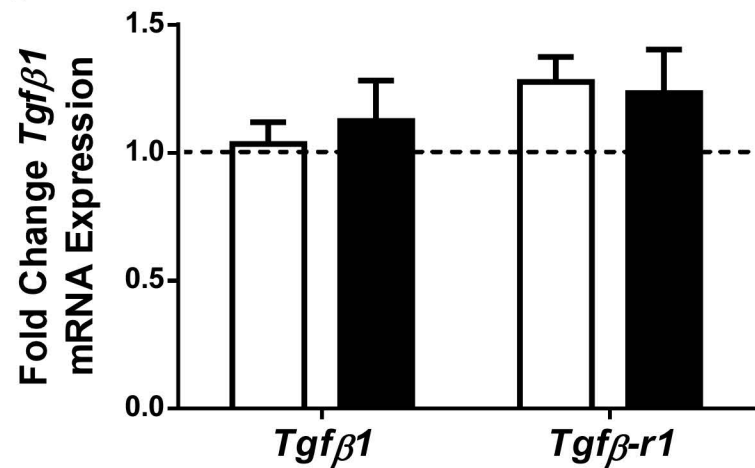

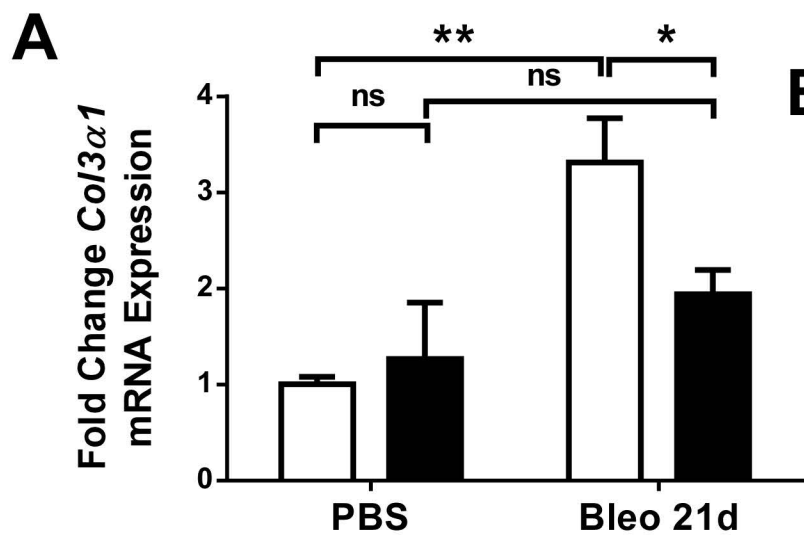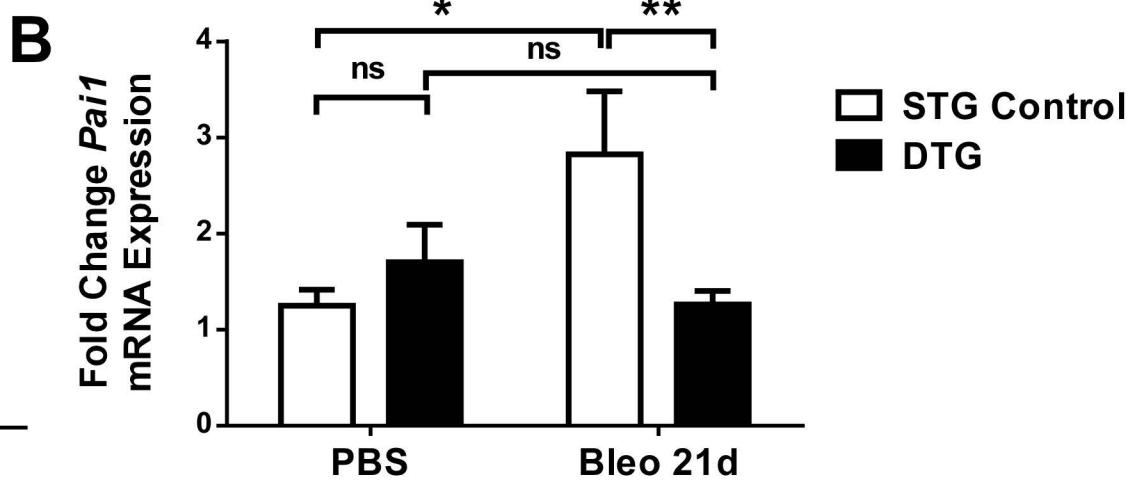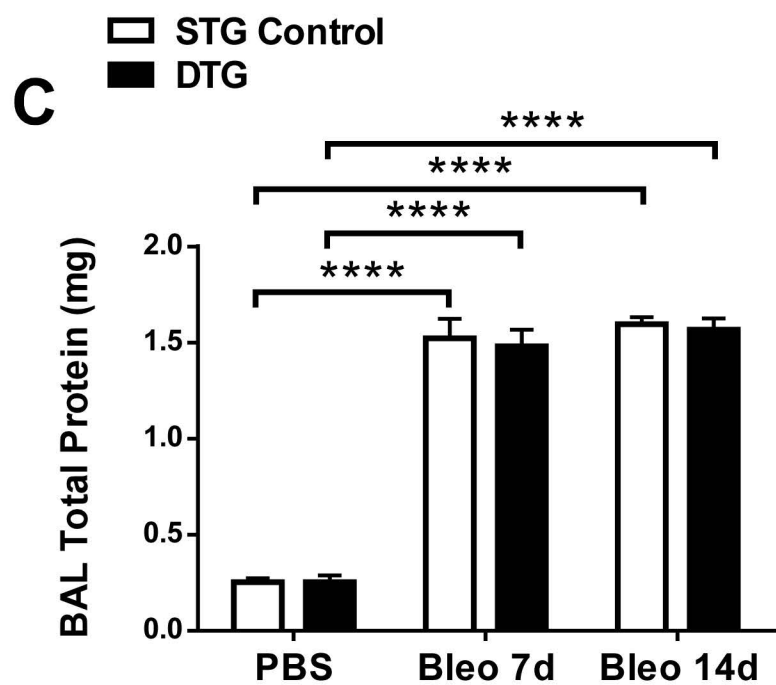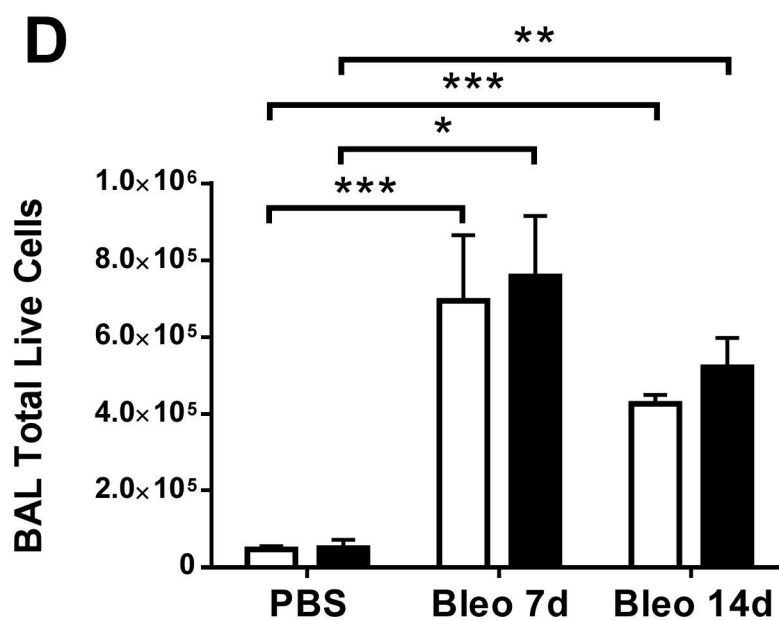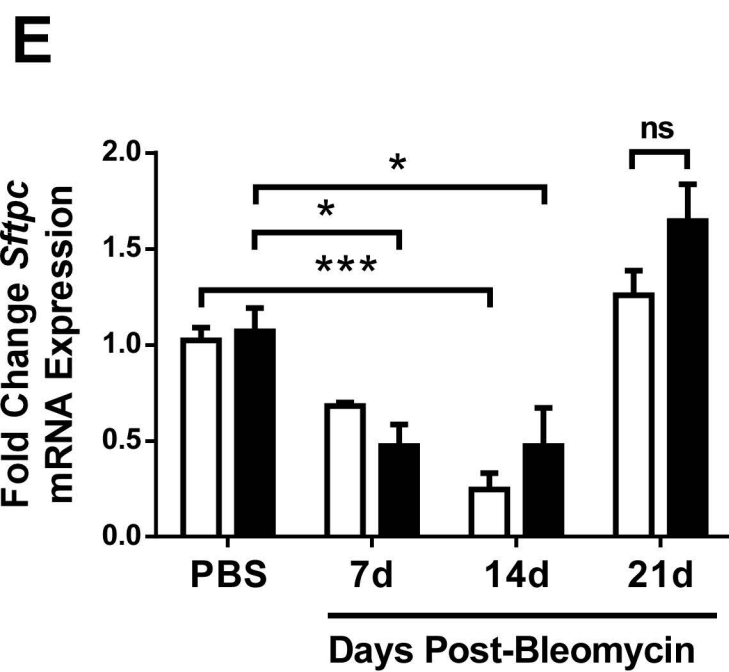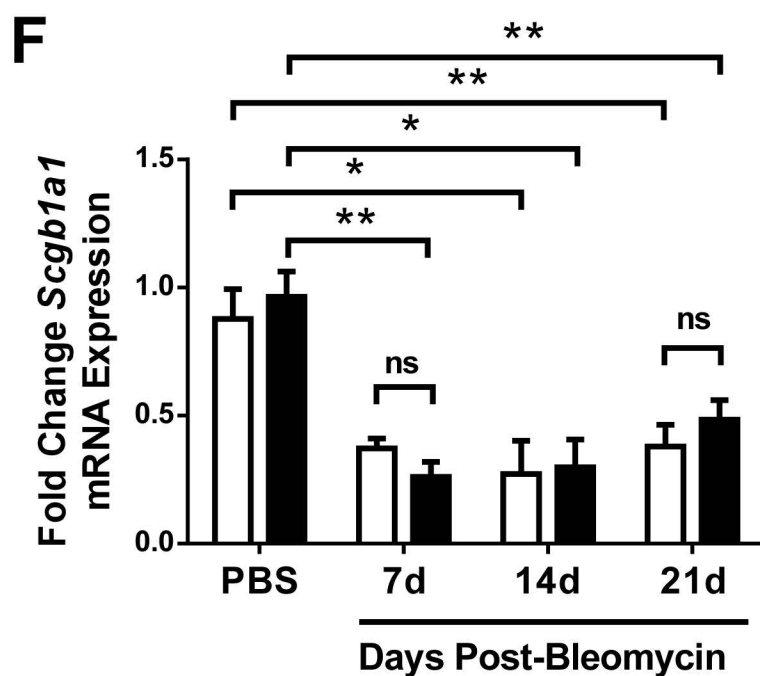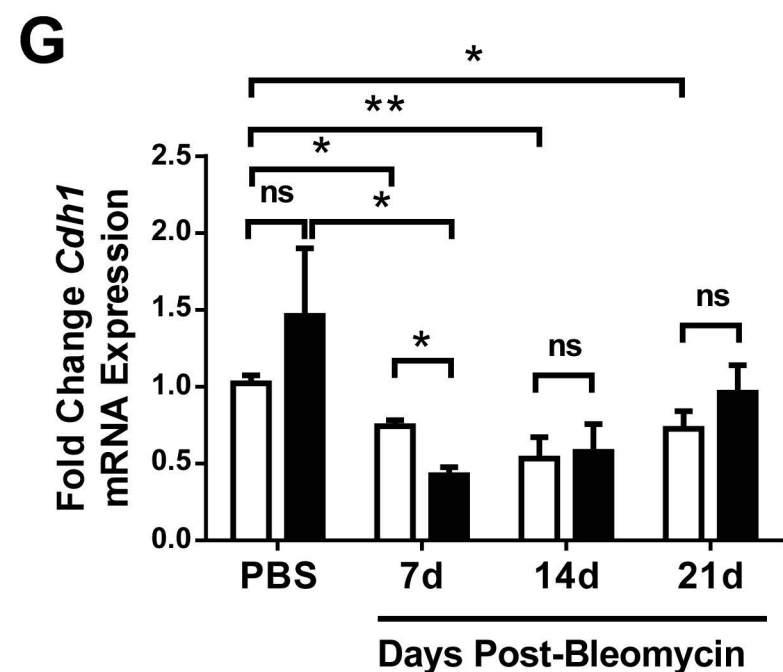



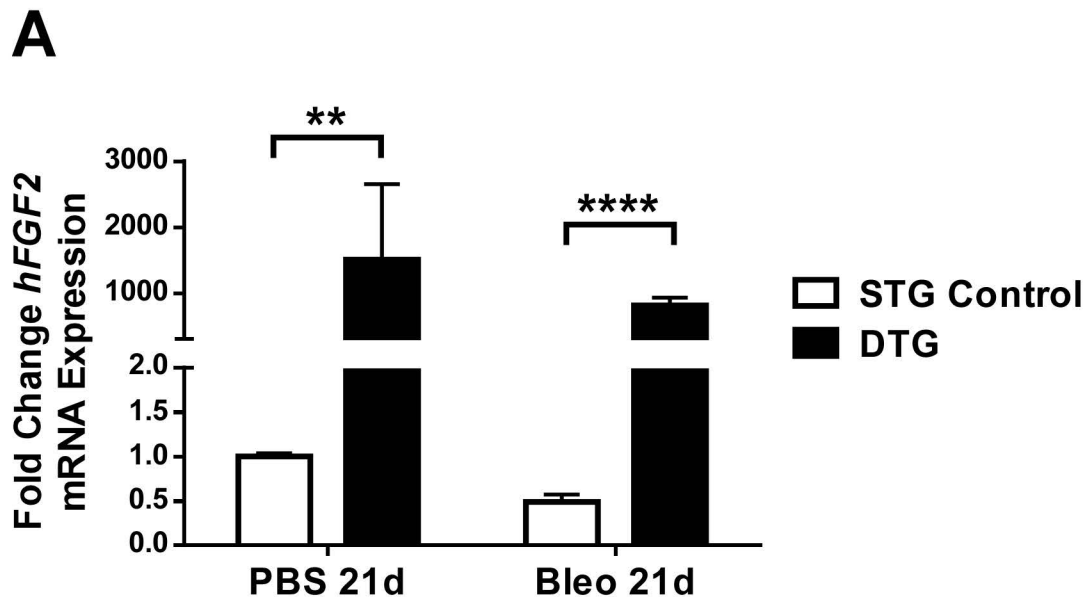

SPC-rtTA - Bleo 21d

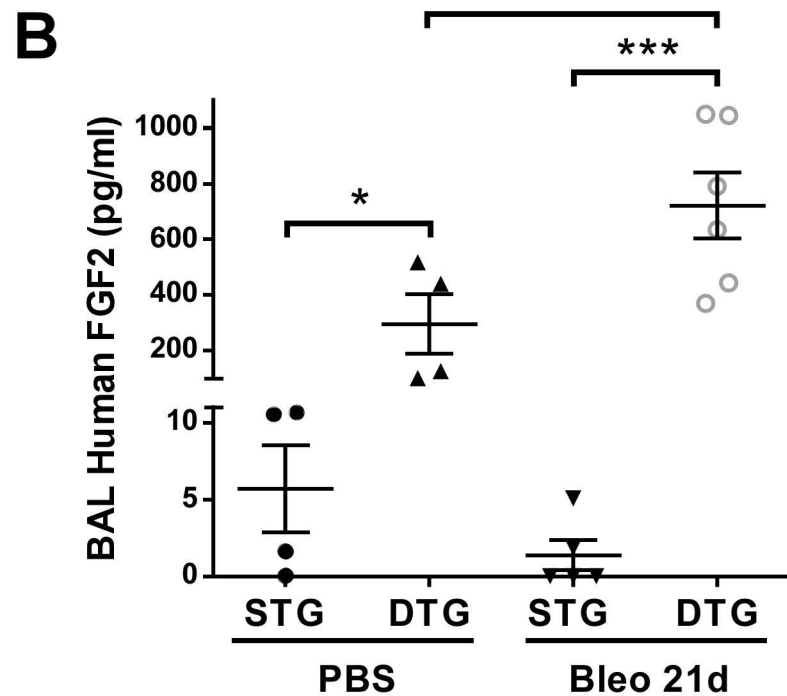

SPC-rtTA;TRE-FGF2 - Bleo 21d

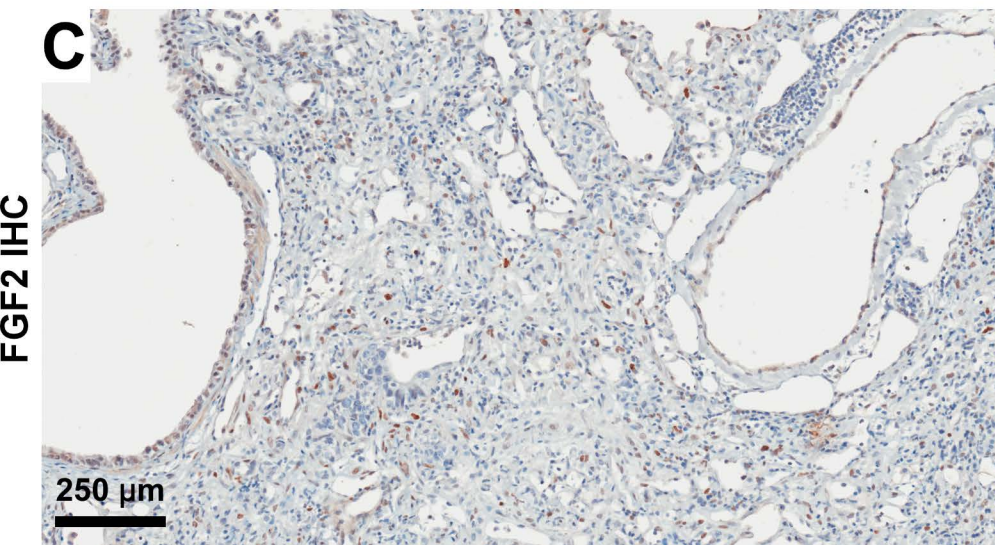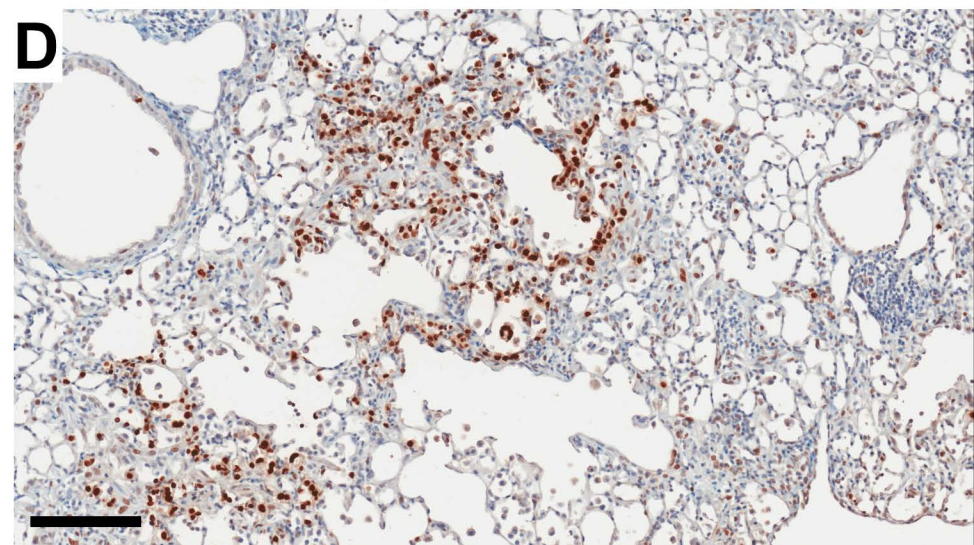

**A**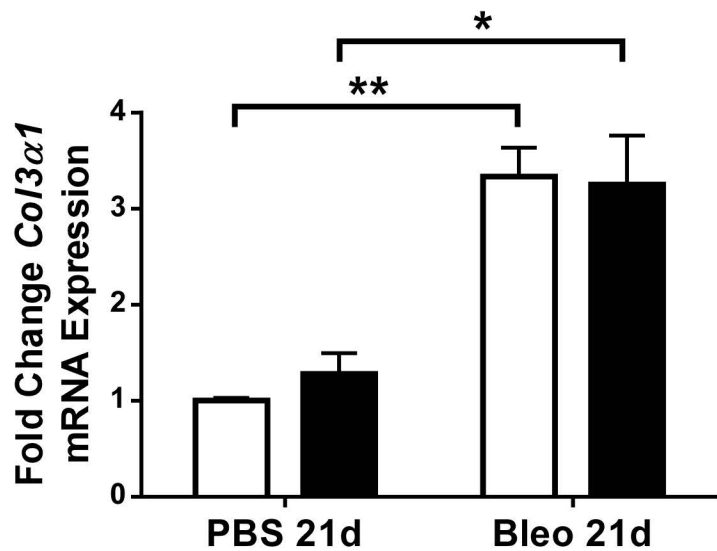**B**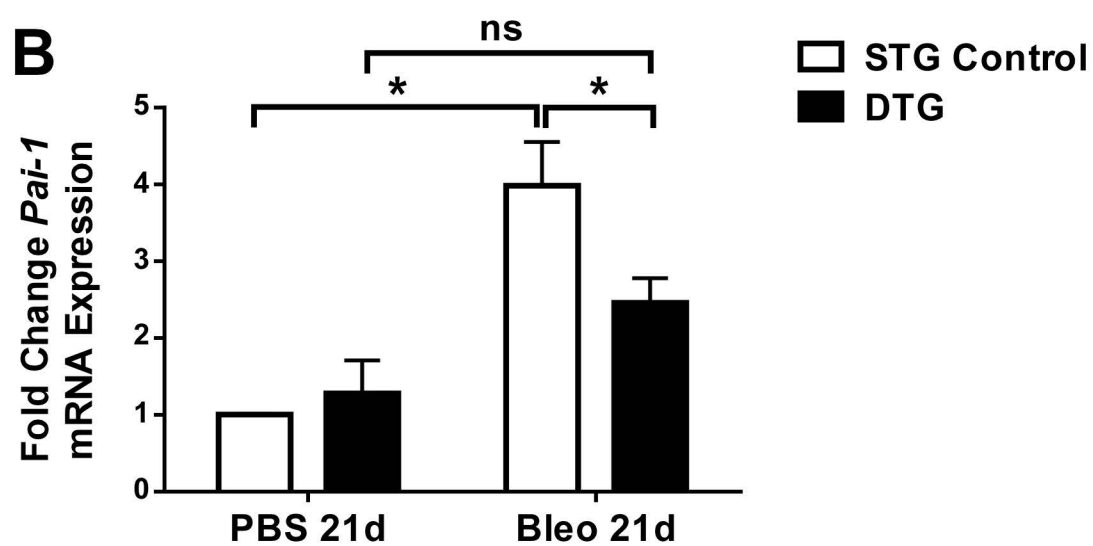**C**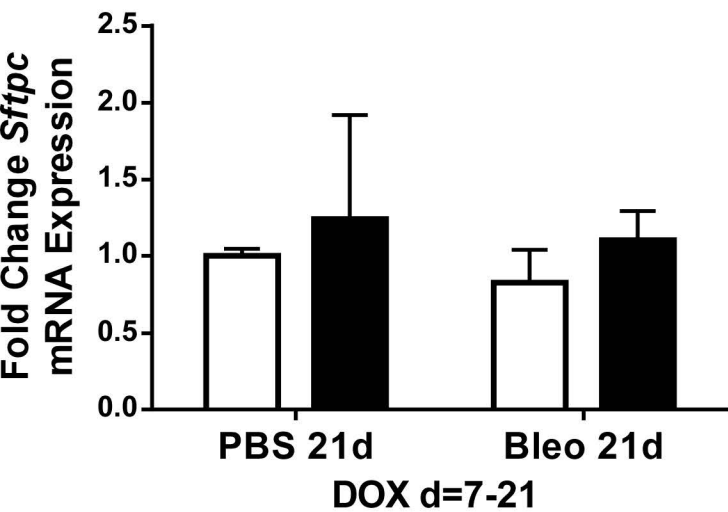**D**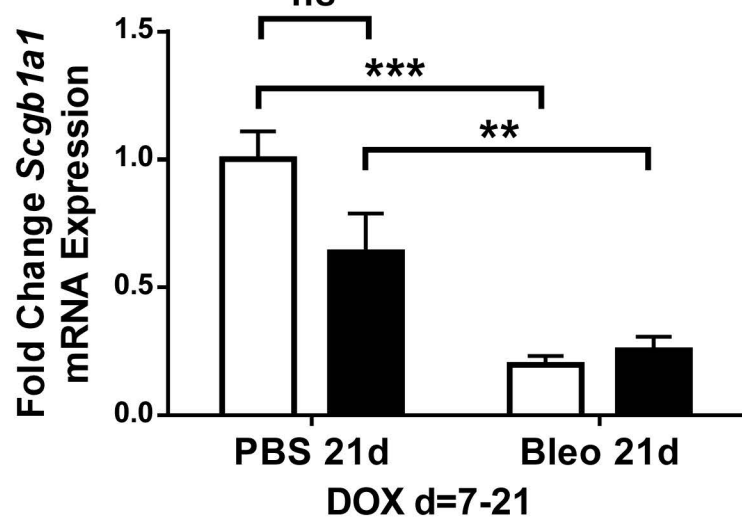**E**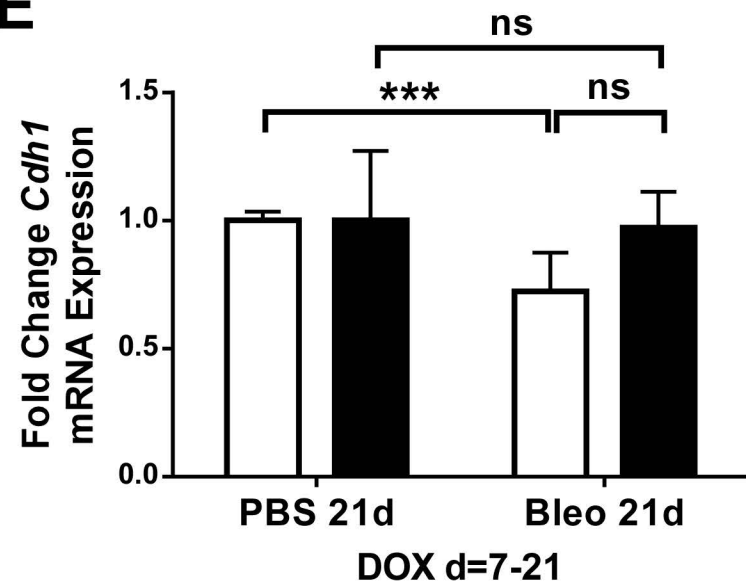

**A**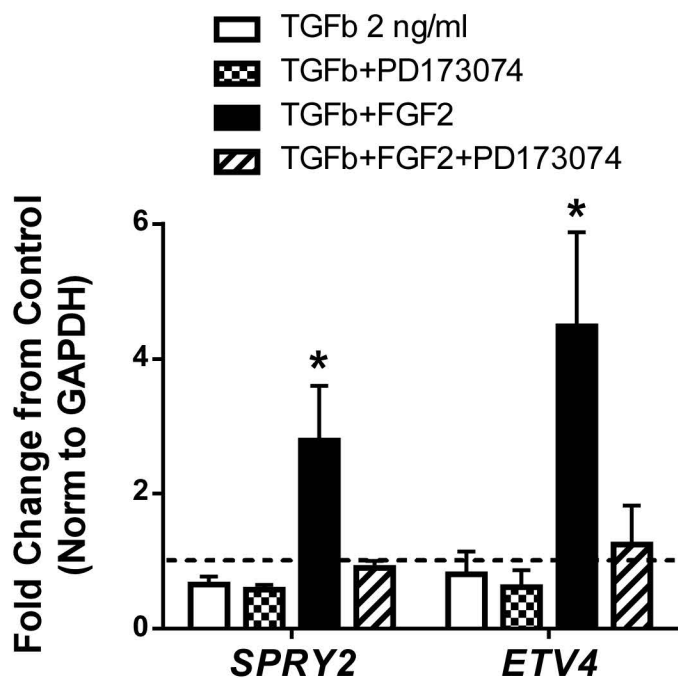**B**

|                       |   |   |   |   |   |   |   |   |   |   |
|-----------------------|---|---|---|---|---|---|---|---|---|---|
| TGFβ1 (2 ng/ml)       | - | - | - | + | + | + | - | - | + | + |
| FGF2 (2 nM) + Heparin | - | - | + | - | - | + | - | + | - | + |
| Heparin Alone         | - | + | - | - | + | - | - | - | - | - |
| PD173074 (0.1 uM)     | - | - | - | - | - | - | + | + | + | + |

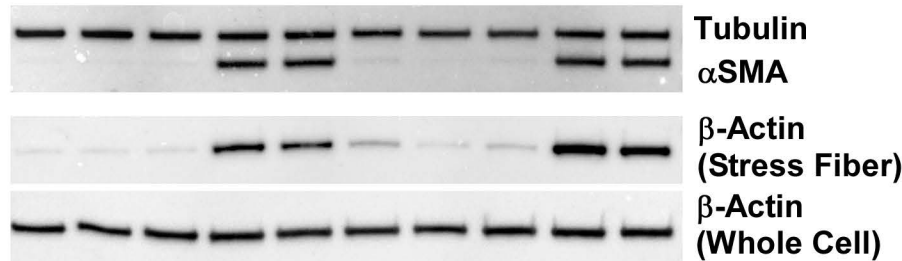**C**

|                   |   |   |   |   |   |   |   |   |
|-------------------|---|---|---|---|---|---|---|---|
| TGFβ1 (2 ng/ml)   | - | - | - | - | + | + | + | + |
| FGF2 (2 nM)       | - | - | + | + | - | - | + | + |
| PD173074 (0.1 uM) | - | + | - | + | - | + | - | + |

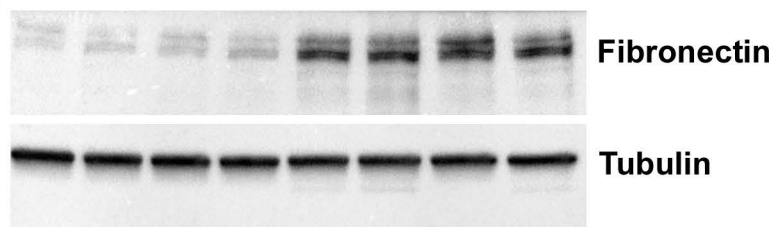

**A**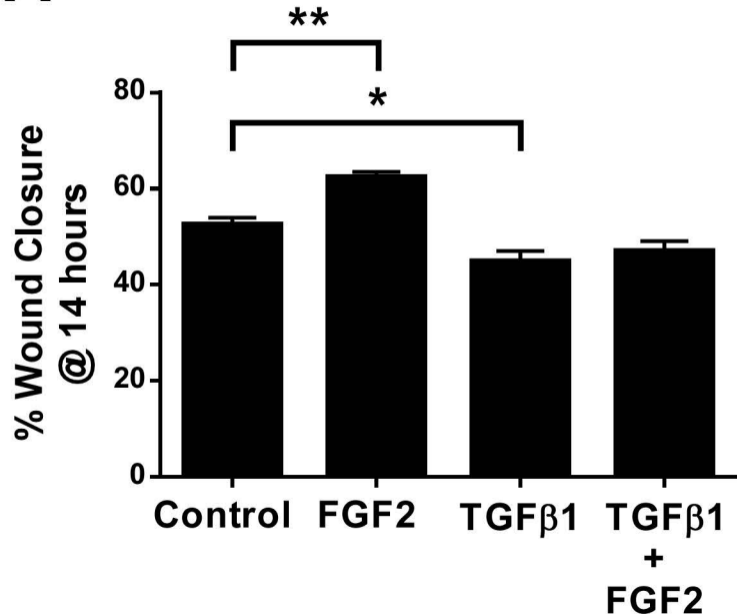**B**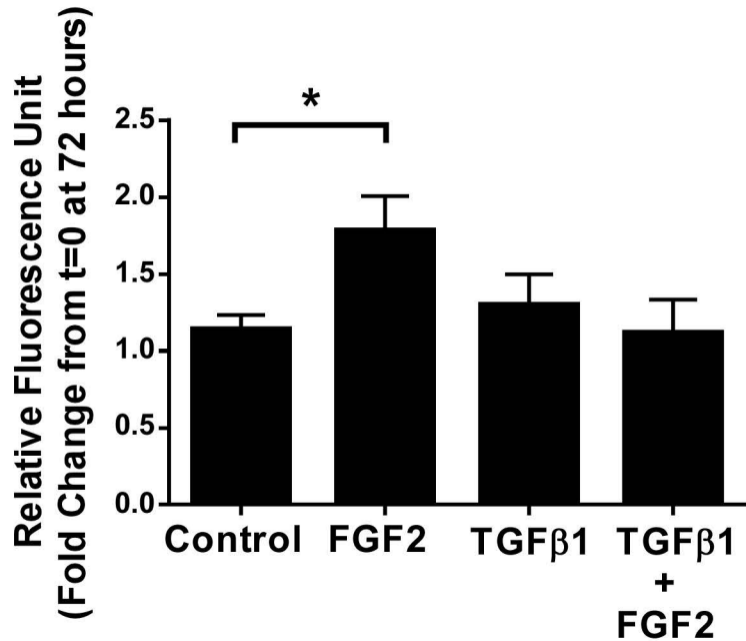

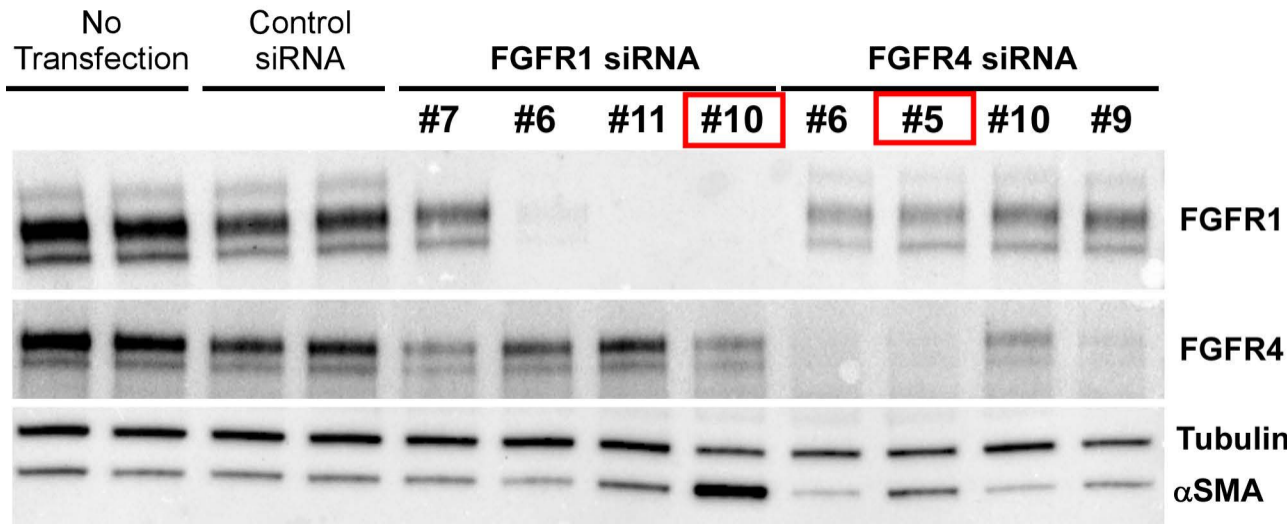

Supplement: NIHMS973825-supplement-Supp_figS1-8.pdf [file NIHMS973825-supplement-Supp_figS1-8.pdf]
